# Supplementary material for: Lactobacillus paragasseri SBT2055 Activates Plasmacytoid Dendritic Cells and Improves Subjective Symptoms of Common Cold in Healthy Adults: A Randomized, Double-Blind, Placebo-Controlled Parallel-Group Comparative Trial
Source: MDPI journal article supplement (doi:10.3390/nu15204458), 2023-10-20
Supplement: s1 [file s1]

Supplementary materials

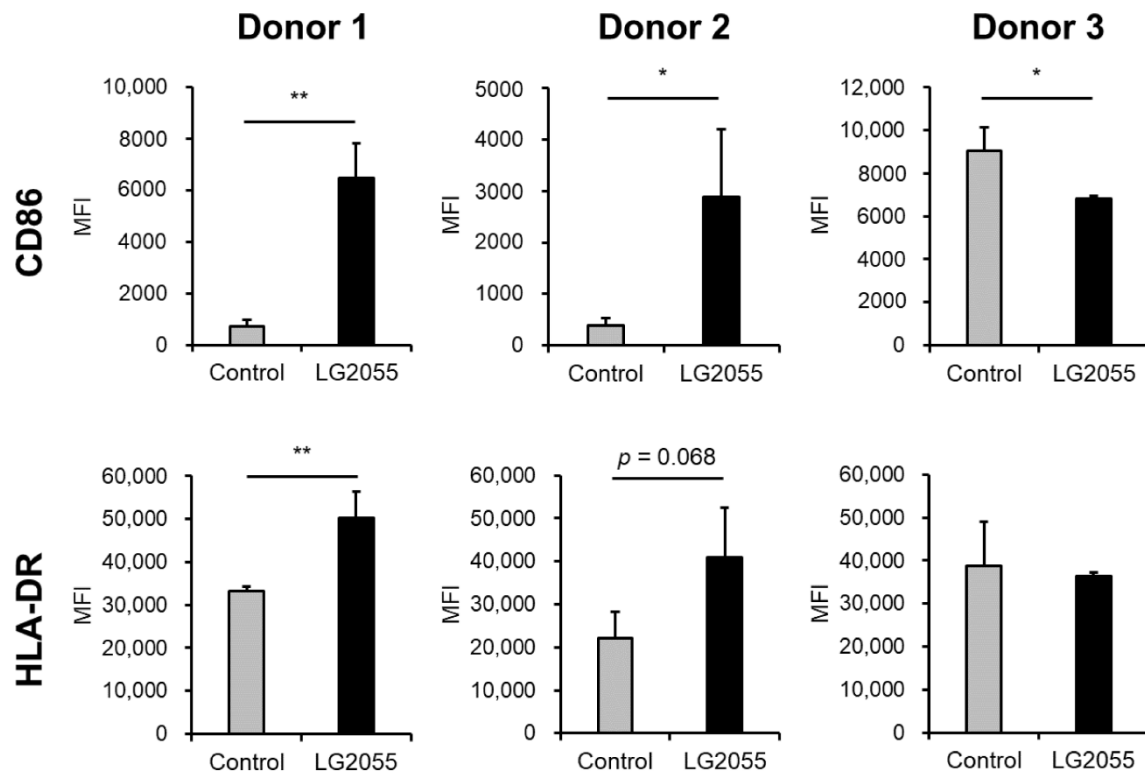

**Supplementary Figure S1.** Evaluation of pDC activation by LG2055 in PBMCs from different donors. PBMCs were treated with LG2055 for 24 h and analyzed CD86 and HLA-DR expression on pDCs by flow cytometry. Each experiment was performed in triplicate; data are shown as mean  $\pm$  SD. \*  $p < 0.05$ , \*\*  $p < 0.01$  according to the Student's  $t$ -test.

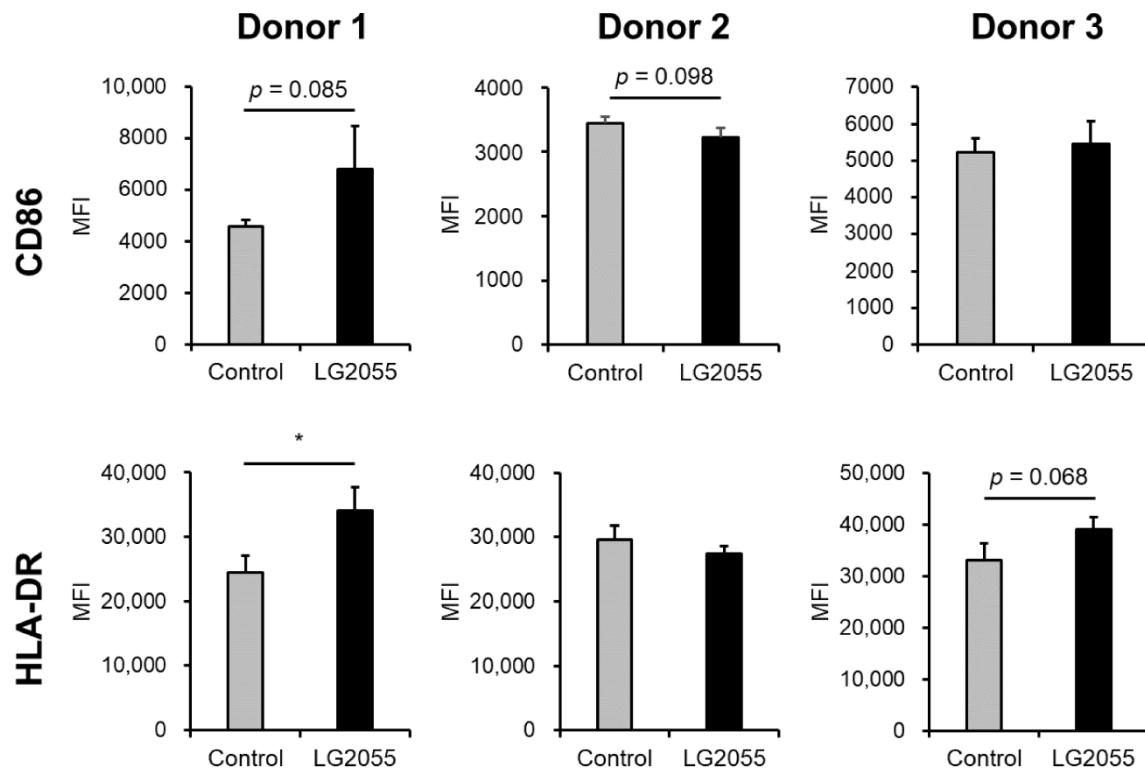

**Supplementary Figure S2.** Evaluation of mDC activation by LG2055 in PBMCs from different donors. PBMCs were treated with LG2055 for 24 h and analyzed CD86 and HLA-DR expression on mDCs by flow cytometry. Each experiment was performed in triplicate; data are shown as mean  $\pm$  SD. \*  $p < 0.05$  according to the Student's  $t$ -test.

**Supplementary Table S1.** CONSORT 2010 checklist of information in this report

| Section/Topic             | Item No. | Checklist item                                                                                                                        | Reported on page No. |
|---------------------------|----------|---------------------------------------------------------------------------------------------------------------------------------------|----------------------|
| Title and abstract        | 1a       | Identification as a randomized trial in the title                                                                                     | Title                |
|                           | 1b       | Structured summary of trial design, methods, results, and conclusions (for specific guidance see CONSORT for abstracts)               | Abstract             |
| Introduction              |          |                                                                                                                                       |                      |
| Background and objectives | 2a       | Scientific background and explanation of rationale                                                                                    | 1. Introduction      |
|                           | 2b       | Specific objectives or hypotheses                                                                                                     | 1. Introduction      |
| Methods                   |          |                                                                                                                                       |                      |
| Trial design              | 3a       | Description of trial design (such as parallel, factorial) including allocation ratio.                                                 | 2.2.3. Study design  |
|                           | 3b       | Important changes to methods after trial commencement (such as eligibility criteria), with reasons                                    | Not applicable       |
| Participants              | 4a       | Eligibility criteria for participants                                                                                                 | 2.2.1. Participants  |
|                           | 4b       | Settings and locations where the data were collected                                                                                  | 2.2.1. Participants  |
| Interventions             | 5        | The interventions for each group with sufficient details to allow replication, including how and when they were actually administered | 2.2.2. Test samples  |
| Outcomes                  | 6a       | Completely defined pre-specified primary and secondary outcome measures, including how and when they were assessed                    | 2.2.4. Outcome       |
|                           | 6b       | Any changes to trial outcomes after the trial commenced, with reasons                                                                 | Not applicable       |
| Sample size               | 7a       | How sample size was determined                                                                                                        | 2.2.10. Sample size  |

|                                                               |     |                                                                                                                                                                                             |                                                 |
|---------------------------------------------------------------|-----|---------------------------------------------------------------------------------------------------------------------------------------------------------------------------------------------|-------------------------------------------------|
|                                                               | 7b  | When applicable, explanation of any interim analyses and stopping guidelines                                                                                                                | Not applicable                                  |
| Randomization:<br>Sequence<br>generation                      | 8a  | Method used to generate the random allocation sequence                                                                                                                                      | 2.2.11.<br>Randomization                        |
|                                                               | 8 b | Type of randomization; details of any restriction (such as blocking and block size)                                                                                                         | 2.2.11.<br>Randomization                        |
| Allocation<br>concealment<br>mechanism                        | 9   | Mechanism used to implement the random allocation sequence (such as sequentially numbered containers), describing any steps taken to conceal the sequence until interventions were assigned | 2.2.11.<br>Randomization                        |
| Implementation                                                | 10  | Who generated the random allocation sequence, who enrolled participants, and who assigned participants to interventions                                                                     | 2.2.11.<br>Randomization                        |
| Blinding                                                      | 11a | If done, who was blinded after assignment to interventions (for example, participants, care providers, those assessing outcomes) and how                                                    | 2.2.11.<br>Randomization                        |
|                                                               | 11b | If relevant, description of the similarity of interventions                                                                                                                                 | Not applicable                                  |
| Statistical<br>methods                                        | 12a | Statistical methods used to compare groups for primary and secondary outcomes                                                                                                               | 2.2.12.<br>Statistical<br>Analysis              |
|                                                               | 12b | Methods for additional analyses, such as subgroup analyses and adjusted analyses                                                                                                            | 3.2.8. Stratified<br>analysis,<br>4. Discussion |
| Results                                                       |     |                                                                                                                                                                                             |                                                 |
| Participant flow<br>(a diagram is<br>strongly<br>recommended) | 13a | For each group, the numbers of participants who were randomly assigned, received intended treatment, and were analyzed for the primary outcome                                              | 3.2.1.<br>Participants,<br>Figure 2             |

|                         |     |                                                                                                                                                   |                                            |
|-------------------------|-----|---------------------------------------------------------------------------------------------------------------------------------------------------|--------------------------------------------|
|                         | 13b | For each group, losses and exclusions after randomization, together with reasons                                                                  | 3.2.1. Participants, Figure 2              |
| Recruitment             | 14a | Dates defining the periods of recruitment and follow-up                                                                                           | 2.2.3. Study design, 3.2.1. Participants   |
|                         | 14b | Why the trial ended or was stopped                                                                                                                | Not applicable                             |
| Baseline data           | 15  | A table showing baseline demographic and clinical characteristics for each group                                                                  | 3.2.2. Background of participants, Table 2 |
| Numbers analyzed        | 16  | For each group, number of participants (denominator) included in each analysis and whether the analysis was by original assigned groups           | 3.2.1. Participants, Figure 2              |
| Outcomes and estimation | 17a | For each primary and secondary outcome, results for each group, and the estimated effect size and its precision (such as 95% confidence interval) | 3. Results                                 |
|                         | 17b | For binary outcomes, presentation of both absolute and relative effect sizes is recommended                                                       | 3. Results                                 |
| Ancillary analyses      | 18  | Results of any other analyses performed, including subgroup analyses and adjusted analyses, distinguishing pre-specified from exploratory         | 3.2.8. Stratified analysis, 4. Discussion  |
| Harms                   | 19  | All important harms or unintended effects in each group (for specific guidance see CONSORT for harms)                                             | 3.2.9. Safety Assessment                   |
| Discussion              |     |                                                                                                                                                   |                                            |
| Limitations             | 20  | Trial limitations, addressing sources of potential bias, imprecision, and, if                                                                     | 4. Discussion                              |

|                   |    |                                                                                                               |                     |
|-------------------|----|---------------------------------------------------------------------------------------------------------------|---------------------|
|                   |    | relevant, multiplicity of analyses                                                                            |                     |
| Generalisability  | 21 | Generalisability (external validity, applicability) of the trial findings                                     | 4. Discussion       |
| Interpretation    | 22 | Interpretation consistent with results, balancing benefits and harms, and considering other relevant evidence | 4. Discussion       |
| Other information |    |                                                                                                               |                     |
| Registration      | 23 | Registration number and name of trial registry                                                                | 2.2.3. Study Design |
| Protocol          | 24 | Where the full trial protocol can be accessed, if available                                                   | 2.2.3. Study Design |
| Funding           | 25 | Sources of funding and other support (such as supply of drugs), role of funders                               | Funding             |

**Supplementary Table S2.** Exclusion criteria

| No. | Exclusion criteria                                                                                                                                                                                                                                  |
|-----|-----------------------------------------------------------------------------------------------------------------------------------------------------------------------------------------------------------------------------------------------------|
| 1   | Participants suffering from, undergoing treatment for, or with a history of serious diseases, such as diabetes, kidney/liver disease, heart disease or thyroid disease, adrenal disease, and other metabolic diseases.                              |
| 2   | Participants with chronic diseases and who take medication on a daily basis.                                                                                                                                                                        |
| 3   | Participants who have been diagnosed with dry mouth.                                                                                                                                                                                                |
| 4   | Participants who are unable to abstain from taking supplement, food for specified health use or functional food, or health food that may affect immune function.                                                                                    |
| 5   | Participants who are unable to abstain from taking food that containing lactic acid bacteria, Bifidobacterium, oligosaccharides, or viable bacteria during the study period.                                                                        |
| 6   | Participants who consistently drink more than the appropriate amount of alcohol.                                                                                                                                                                    |
| 7   | Participants who are unable to abstain from alcohol for 2 days prior to the screening test and each test.                                                                                                                                           |
| 8   | Participants with food allergies.                                                                                                                                                                                                                   |
| 9   | Participants who take or plan to take medicine for seasonal allergic rhinitis (pollen allergy).                                                                                                                                                     |
| 10  | Participants with digestive diseases affecting digestion and absorption and those with a history of digestive surgery (excluding appendicitis).                                                                                                     |
| 11  | Participants who tend to get diarrhea by taking dairy products.                                                                                                                                                                                     |
| 12  | Participants who are pregnant women, women who intend to become pregnant during the research period, and women who are breastfeeding.                                                                                                               |
| 13  | Participants who are judged to be inappropriate as research participants based on blood tests results obtained during the screening tests.                                                                                                          |
| 14  | Participants who have a history or current condition of drug or alcohol dependence.                                                                                                                                                                 |
| 15  | Participants who are participating in research involving the ingestion of other foods or the use of other medicines or those who have participated in or are willing to participate in other clinical research within 1 month of obtaining consent. |
| 16  | Participants who are judged to be inappropriate as research participants by the principal investigator.                                                                                                                                             |
| 17  | Participants who smoke 21 or more cigarettes a day.                                                                                                                                                                                                 |
| 18  | Participants who plan to receive the influenza vaccine from 3 weeks before ingestion to the end of the ingestion period.                                                                                                                            |
| 19  | Participants who plan to receive the coronavirus disease 2019 (COVID-19) vaccine                                                                                                                                                                    |

|    |                                                                                                                                                                                               |
|----|-----------------------------------------------------------------------------------------------------------------------------------------------------------------------------------------------|
|    | during the ingestion period.                                                                                                                                                                  |
| 20 | Participants who work on night shift.                                                                                                                                                         |
| 21 | Participants who plan to travel abroad, including overseas travel, during the study.                                                                                                          |
| 22 | Participants who have donated more than 200 ml of blood within 1 month or 400 ml of blood within 3 months prior to the date of obtaining consent, or those who have donated blood components. |

**Supplementary Table S3.** Instructions followed by the participants during the study

| No. | Observance                                                                                                                                                                                       |
|-----|--------------------------------------------------------------------------------------------------------------------------------------------------------------------------------------------------|
| 1   | Intake the test samples as instructed.                                                                                                                                                           |
| 2   | Do not allow other persons to intake the test samples.                                                                                                                                           |
| 3   | Avoid drinking alcohol 2 days before the test.                                                                                                                                                   |
| 4   | Avoid taking any food and drinks after 21:00 on the day before the test (only water was permitted).                                                                                              |
| 5   | Avoid taking water 1 h before the test and until the end of the test.                                                                                                                            |
| 6   | Avoid smoking until the end of the test on the day of the test.                                                                                                                                  |
| 7   | Avoid any dental treatment 2 days before the test.                                                                                                                                               |
| 8   | Maintain your regular lifestyle, such as food and exercise (to avoid undereating, overeating, overexercising, and traveling abroad).                                                             |
| 9   | Avoid taking more food or drinks, including caffeine, than usual.                                                                                                                                |
| 10  | Avoid the use and/or the intake of medicines, supplements, and/or healthy food (including Food for Specified Health Uses and Foods with Functional Claims) that may influence the immune system. |
| 11  | Avoid the intake of food containing viable bacteria, such as lactic acid bacteria, Bifidobacteria, and natto (fermented soybeans) bacteria, and/or enhanced with oligosaccharides.               |
| 12  | Avoid donation of blood and/or blood components.                                                                                                                                                 |
| 13  | Avoid the overconsumption of alcohol (up to 20 g alcohol/day).                                                                                                                                   |
| 14  | Use medicines after getting the permission of the principal investigator (except in case of emergency).                                                                                          |
| 15  | Keep a daily record of the test sample consumption, defecation, ingestion of healthy food, usage of medicine, and physical health questionnaire.                                                 |



**Supplementary Table S4.** Comparison of pDC activity (CD86 and HLA-DR expression)

| Parameter | Week | Group   | <i>n</i> | Measured value |   |        |                 |
|-----------|------|---------|----------|----------------|---|--------|-----------------|
|           |      |         |          | Mean           | ± | SD     | <i>p</i> -Value |
| CD86      | 0    | LG2055  | 95       | 1158.0         | ± | 235.6  | 0.814           |
|           |      | Placebo | 96       | 1172.6         | ± | 311.8  |                 |
|           | 6    | LG2055  | 95       | 1033.4         | ± | 212.8  | 0.582           |
|           |      | Placebo | 95       | 1025.5         | ± | 236.8  |                 |
|           | 12   | LG2055  | 95       | 870.7          | ± | 190.1  | 0.359           |
|           |      | Placebo | 96       | 844.0          | ± | 164.9  |                 |
| HLA-DR    | 0    | LG2055  | 95       | 19429.7        | ± | 4956.5 | 0.547           |
|           |      | Placebo | 96       | 18998.7        | ± | 4916.8 |                 |
|           | 6    | LG2055  | 95       | 19368.2        | ± | 4603.2 | 0.305           |
|           |      | Placebo | 95       | 18704.7        | ± | 4274.0 |                 |
|           | 12   | LG2055  | 95       | 22231.3        | ± | 5094.1 | 0.428           |
|           |      | Placebo | 96       | 21666.9        | ± | 4716.7 |                 |

**Supplementary Table S5.** Comparison of immunological markers

| Parameter                 | Week | Group   | <i>n</i> | Measured value |   |       |                 |
|---------------------------|------|---------|----------|----------------|---|-------|-----------------|
|                           |      |         |          | Mean           | ± | SD    | <i>p</i> -Value |
| Salivary sIgA<br>(µg/min) | 0    | LG2055  | 95       | 108.6          | ± | 51.5  | 0.565           |
|                           |      | Placebo | 96       | 111.9          | ± | 52.7  |                 |
|                           | 6    | LG2055  | 95       | 115.9          | ± | 53.8  | 0.972           |
|                           |      | Placebo | 95       | 120.3          | ± | 68.2  |                 |
|                           | 12   | LG2055  | 95       | 114.4          | ± | 56.9  | 0.888           |
|                           |      | Placebo | 96       | 118.5          | ± | 79.0  |                 |
| Serum IgA<br>(mg/dL)      | 0    | LG2055  | 95       | 211.1          | ± | 79.9  | 0.154           |
|                           |      | Placebo | 96       | 263.4          | ± | 363.7 |                 |
|                           | 6    | LG2055  | 95       | 212.9          | ± | 82.8  | 0.175           |
|                           |      | Placebo | 95       | 266.7          | ± | 387.8 |                 |
|                           | 12   | LG2055  | 95       | 206.6          | ± | 80.5  | 0.124           |
|                           |      | Placebo | 96       | 259.6          | ± | 362.5 |                 |
| Serum IgG<br>(mg/dL)      | 0    | LG2055  | 95       | 1188.5         | ± | 218.6 | 0.690           |
|                           |      | Placebo | 96       | 1175.9         | ± | 218.9 |                 |
|                           | 6    | LG2055  | 95       | 1180.9         | ± | 223.6 | 0.784           |
|                           |      | Placebo | 95       | 1172.0         | ± | 218.9 |                 |
|                           | 12   | LG2055  | 95       | 1194.3         | ± | 223.4 | 0.896           |
|                           |      | Placebo | 96       | 1190.1         | ± | 224.0 |                 |
| NK cell activity<br>(%)   | 0    | LG2055  | 38       | 59.1           | ± | 16.9  | 0.371           |
|                           |      | Placebo | 39       | 62.9           | ± | 19.4  |                 |
|                           | 6    | LG2055  | 38       | 66.6           | ± | 14.6  | 0.349           |
|                           |      | Placebo | 39       | 70.1           | ± | 17.8  |                 |
|                           | 12   | LG2055  | 38       | 67.9           | ± | 14.5  | 0.714           |
|                           |      | Placebo | 39       | 69.2           | ± | 17.7  |                 |

**Supplementary Table S6.** Effects of LG2055 intake on fecal microbiota

| Genus                | Group   | n  | 0 week |   |      | 12 weeks |   |            |
|----------------------|---------|----|--------|---|------|----------|---|------------|
|                      |         |    | Mean   | ± | SD   | Mean     | ± | SD         |
| <i>Lactobacillus</i> | LG2055  | 95 | 0.02   | ± | 0.09 | 0.03     | ± | 0.10 **, # |
| (%)                  | Placebo | 96 | 0.03   | ± | 0.22 | 0.02     | ± | 0.15       |
| <i>Butyricimonas</i> | LG2055  | 95 | 0.07   | ± | 0.13 | 0.11     | ± | 0.20 **    |
| (%)                  | Placebo | 96 | 0.11   | ± | 0.26 | 0.11     | ± | 0.21       |
| <i>Agathobacter</i>  | LG2055  | 95 | 1.16   | ± | 1.61 | 1.46     | ± | 1.90 #     |
| (%)                  | Placebo | 96 | 1.08   | ± | 1.60 | 1.38     | ± | 2.19       |

\*Significant difference between two groups (\*\*  $p < 0.01$ ).

#Significant difference within the group (#  $p < 0.05$ , ##  $p < 0.01$ ).

**Supplementary Table S7.** Comparison of pDC activity (CD86 and HLA-DR expression) (stratified analysis)

| Parameter | Week | Group   | n  | Measured value |   |        |         |
|-----------|------|---------|----|----------------|---|--------|---------|
|           |      |         |    | Mean           | ± | SD     | p-Value |
| CD86      | 0    | LG2055  | 57 | 1169.3         | ± | 262.4  | 0.623   |
|           |      | Placebo | 55 | 1178.8         | ± | 342.7  |         |
|           | 6    | LG2055  | 57 | 1033.3         | ± | 212.8  | 0.543   |
|           |      | Placebo | 55 | 1011.0         | ± | 214.7  |         |
|           | 12   | LG2055  | 57 | 887.7          | ± | 203.6  | 0.025*  |
|           |      | Placebo | 55 | 806.1          | ± | 146.7  |         |
| HLA-DR    | 0    | LG2055  | 57 | 19248.1        | ± | 5261.2 | 0.202   |
|           |      | Placebo | 55 | 18026.0        | ± | 4789.9 |         |
|           | 6    | LG2055  | 57 | 19213.3        | ± | 4463.5 | 0.110   |
|           |      | Placebo | 55 | 17914.1        | ± | 4057.7 |         |
|           | 12   | LG2055  | 57 | 22496.9        | ± | 4930.2 | 0.090   |
|           |      | Placebo | 55 | 20946.1        | ± | 4640.7 |         |

\*Significant difference between the two groups ( $p < 0.05$ ).

**Supplementary Table S8. Bacterial composition of each cluster (top 10 genera)**

| Genus                                              | Cluster 1 | Cluster 2 | Cluster 3 |
|----------------------------------------------------|-----------|-----------|-----------|
| <i>Bacteroides</i>                                 | 15.5%     | 43.4%     | 28.7%     |
| <i>Prevotella</i>                                  | 27.4%     | 0.5%      | 1.9%      |
| <i>Faecalibacterium</i>                            | 6.1%      | 5.8%      | 4.8%      |
| <i>Parabacteroides</i>                             | 4.0%      | 4.4%      | 4.1%      |
| <i>Bifidobacterium</i>                             | 1.6%      | 4.2%      | 4.7%      |
| family <i>Lachnospiraceae</i> (unclassified genus) | 2.0%      | 3.5%      | 2.3%      |
| <i>Phascolarctobacterium</i>                       | 3.3%      | 2.2%      | 1.7%      |
| <i>Lachnoclostridium</i>                           | 2.2%      | 2.5%      | 1.5%      |
| <i>Sutterella</i>                                  | 2.2%      | 2.1%      | 1.8%      |
| <i>Fusobacterium</i>                               | 1.2%      | 1.9%      | 1.1%      |

**Supplementary Table S9. Comparison of pDC activity (CD86 expression) in each cluster**

| Cluster | Week | Group   | <i>n</i> | Measured value |   |       |                 |
|---------|------|---------|----------|----------------|---|-------|-----------------|
|         |      |         |          | Mean           | ± | SD    | <i>p</i> -Value |
| 1       | 0    | LG2055  | 26       | 1109.6         | ± | 190.3 | 0.642           |
|         |      | Placebo | 11       | 1293.1         | ± | 570.3 |                 |
|         | 6    | LG2055  | 26       | 962.7          | ± | 137.6 | 0.173           |
|         |      | Placebo | 11       | 1099.4         | ± | 282.2 |                 |
|         | 12   | LG2055  | 26       | 882.4          | ± | 230.5 | 0.046 *         |
|         |      | Placebo | 11       | 744.3          | ± | 141.8 |                 |
| 2       | 0    | LG2055  | 45       | 1155.4         | ± | 221.0 | 0.649           |
|         |      | Placebo | 43       | 1191.3         | ± | 285.2 |                 |
|         | 6    | LG2055  | 45       | 1051.7         | ± | 248.7 | 0.607           |
|         |      | Placebo | 43       | 1044.1         | ± | 277.4 |                 |
|         | 12   | LG2055  | 45       | 846.7          | ± | 171.0 | 0.238           |
|         |      | Placebo | 43       | 890.6          | ± | 166.8 |                 |
| 3       | 0    | LG2055  | 24       | 1215.3         | ± | 296.5 | 0.170           |
|         |      | Placebo | 42       | 1121.8         | ± | 236.1 |                 |
|         | 6    | LG2055  | 24       | 1075.8         | ± | 195.0 | 0.117           |
|         |      | Placebo | 42       | 987.6          | ± | 169.8 |                 |
|         | 12   | LG2055  | 24       | 902.9          | ± | 177.8 | 0.059           |
|         |      | Placebo | 42       | 822.4          | ± | 155.5 |                 |

\*Significant difference between two groups ( $p < 0.05$ ).
